# Supplementary material
Source: PubMed Central journal article supplement (PMC3009774)
Supplement: 1012490107_pnas.201012490SI.pdf [file 1012490107_pnas.201012490SI.pdf]

# Supporting Information

Yu et al. 10.1073/pnas.1012490107

## SI Materials and Methods

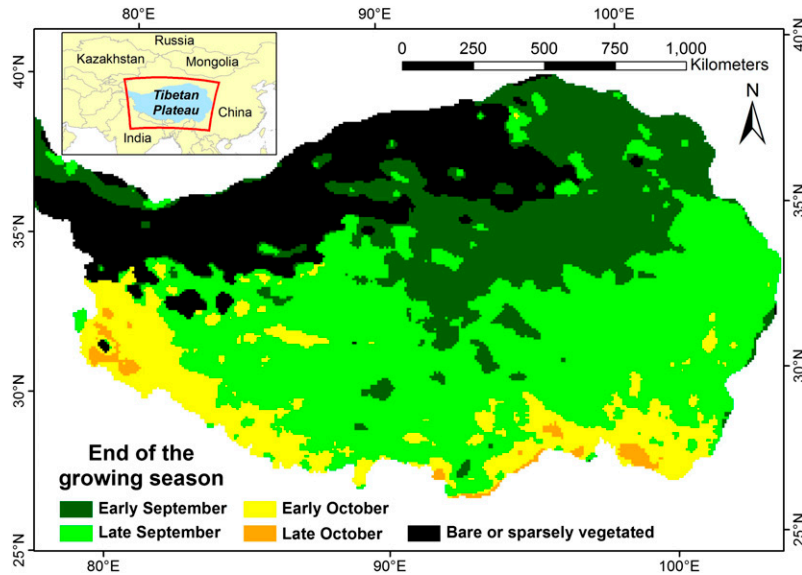

Fig. S1. Average timing of the end of the growing season (EGS) on the Tibetan Plateau between 1982 and 2006. EGS dates varied by up to one month between different parts of the Plateau.

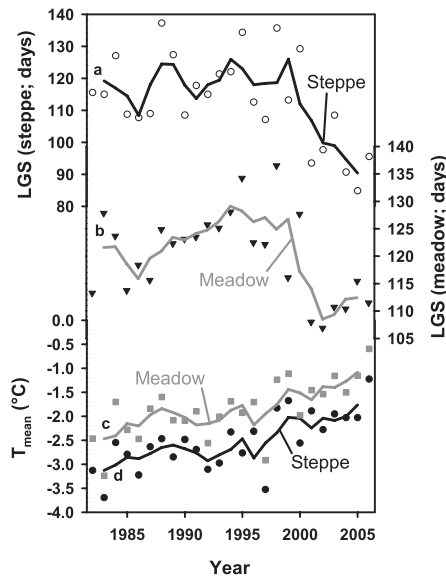

Fig. S2. Length of the growing season (LGS) for steppe (a) and meadow (b) vegetation on the Tibetan Plateau between 1982 and 2006 derived from 15-d Normalized Difference Vegetation Index composites obtained from the Advanced Very High Resolution Radiometer sensor. In response to a delayed beginning and (especially for steppe) an advancing end of the growing season, the length of the growing season declined for both steppe and meadow vegetation. Such a decline has not typically been associated with rising temperatures [which occurred in both steppe (d) and meadow (c)], which is generally expected to extend the period, during which vegetation is active. Lines in the graph represent 3-y running means.

**Table S1. Mean monthly temperatures in the steppe region of the Tibetan Plateau between 1982 and 2006**

| Year                             | Jan          | Feb          | Mar         | Apr         | May         | Jun         | Jul         | Aug         | Sep         | Oct         | Nov         | Dec          |
|----------------------------------|--------------|--------------|-------------|-------------|-------------|-------------|-------------|-------------|-------------|-------------|-------------|--------------|
|                                  | °C           |              |             |             |             |             |             |             |             |             |             |              |
| 1982                             | -13.6        | -13.1        | -8.0        | -3.3        | 0.8         | 5.2         | 8.2         | 8.0         | 3.9         | -2.9        | -9.4        | -13.6        |
| 1983                             | -16.0        | -15.2        | -8.9        | -4.5        | 1.4         | 4.7         | 8.0         | 7.7         | 4.7         | -2.4        | -10.0       | -14.0        |
| 1984                             | -15.2        | -11.6        | -6.1        | -1.9        | 3.0         | 6.9         | 7.2         | 7.0         | 3.5         | -1.7        | -10.0       | -11.6        |
| 1985                             | -15.5        | -12.1        | -5.4        | -1.8        | 2.2         | 6.0         | 7.3         | 8.3         | 3.5         | -2.6        | -10.4       | -13.0        |
| 1986                             | -15.0        | -12.4        | -8.2        | -3.2        | 1.0         | 6.6         | 8.3         | 7.5         | 3.3         | -3.9        | -8.8        | -13.7        |
| 1987                             | -14.6        | -10.8        | -6.8        | -2.5        | 1.1         | 7.0         | 8.7         | 7.1         | 4.3         | -2.3        | -7.9        | -15.0        |
| 1988                             | -14.9        | -10.8        | -8.2        | -2.2        | 3.0         | 6.6         | 8.9         | 7.7         | 4.4         | -2.2        | -9.5        | -12.4        |
| 1989                             | -15.8        | -12.1        | -7.1        | -3.2        | 2.5         | 6.2         | 8.6         | 7.1         | 5.1         | -2.0        | -9.5        | -13.9        |
| 1990                             | -11.5        | -11.4        | -8.4        | -3.5        | 2.3         | 7.2         | 8.0         | 7.3         | 4.1         | -2.8        | -8.5        | -12.6        |
| 1991                             | -16.2        | -10.8        | -6.8        | -2.8        | 2.5         | 7.0         | 9.2         | 7.3         | 4.0         | -2.5        | -9.7        | -13.5        |
| 1992                             | -14.3        | -14.2        | -6.4        | -1.7        | 1.2         | 5.6         | 7.0         | 7.7         | 4.7         | -3.0        | -9.8        | -14.1        |
| 1993                             | -14.3        | -10.1        | -8.1        | -8.1        | 2.5         | 6.2         | 8.7         | 7.9         | 3.4         | -2.7        | -8.4        | -12.6        |
| 1994                             | -13.0        | -12.5        | -7.3        | -2.8        | 2.6         | 6.9         | 9.0         | 8.2         | 5.5         | -2.8        | -9.1        | -12.6        |
| 1995                             | -17.1        | -13.1        | -7.5        | -3.2        | 4.4         | 8.2         | 8.4         | 7.3         | 5.0         | -1.8        | -10.0       | -13.7        |
| 1996                             | -14.5        | -11.6        | -6.4        | -2.1        | 2.7         | 6.2         | 8.8         | 8.2         | 4.0         | -2.2        | -8.1        | -12.8        |
| 1997                             | -15.1        | -13.2        | -6.5        | -3.3        | 1.5         | 5.6         | 8.7         | 7.8         | 3.8         | -4.6        | -10.2       | -16.9        |
| 1998                             | -15.4        | -11.3        | -8.0        | -1.2        | 3.8         | 8.5         | 9.1         | 8.3         | 5.7         | -0.8        | -7.7        | -13.0        |
| 1999                             | -14.0        | -9.2         | -5.3        | -0.5        | 3.3         | 7.2         | 8.9         | 7.6         | 5.4         | -2.0        | -8.1        | -13.6        |
| 2000                             | -14.2        | -14.0        | -8.7        | -2.2        | 3.7         | 7.4         | 9.2         | 7.5         | 4.1         | -1.8        | -8.3        | -13.5        |
| 2001                             | -13.2        | -9.9         | -7.9        | -2.6        | 2.4         | 6.6         | 9.9         | 8.1         | 5.3         | -1.3        | -7.8        | -12.3        |
| 2002                             | -15.9        | -10.9        | -7.2        | -1.1        | 2.1         | 7.1         | 9.6         | 8.2         | 3.7         | -2.7        | -8.6        | -11.8        |
| 2003                             | -13.3        | -11.3        | -6.8        | -1.3        | 1.1         | 6.6         | 8.3         | 8.8         | 5.3         | -1.3        | -7.4        | -12.4        |
| 2004                             | -13.7        | -10.9        | -5.8        | -2.3        | 1.7         | 6.9         | 9.1         | 8.5         | 5.6         | -2.0        | -8.4        | -13.0        |
| 2005                             | -13.7        | -10.9        | -5.8        | -2.3        | 1.7         | 6.9         | 9.1         | 8.5         | 5.6         | -2.0        | -8.4        | -13.0        |
| 2006                             | -10.5        | -7.8         | -7.0        | -2.5        | 3.5         | 7.4         | 10.0        | 8.4         | 5.1         | -1.8        | -7.8        | -11.8        |
| <b>Mean</b>                      | <b>-14.4</b> | <b>-11.6</b> | <b>-7.1</b> | <b>-2.6</b> | <b>2.3</b>  | <b>6.7</b>  | <b>8.7</b>  | <b>7.8</b>  | <b>4.5</b>  | <b>-2.3</b> | <b>-8.9</b> | <b>-13.2</b> |
| <b>Trend (year<sup>-1</sup>)</b> | <b>0.08</b>  | <b>0.10</b>  | <b>0.04</b> | <b>0.06</b> | <b>0.04</b> | <b>0.06</b> | <b>0.07</b> | <b>0.04</b> | <b>0.06</b> | <b>0.04</b> | <b>0.08</b> | <b>0.03</b>  |

All months showed temperature increases during this period.

**Table S2. Mean monthly temperatures in the meadow region of the Tibetan Plateau between 1982 and 2006**

| Year                             | Jan          | Feb         | Mar         | Apr         | May         | Jun         | Jul         | Aug         | Sep         | Oct         | Nov         | Dec          |
|----------------------------------|--------------|-------------|-------------|-------------|-------------|-------------|-------------|-------------|-------------|-------------|-------------|--------------|
| °C                               |              |             |             |             |             |             |             |             |             |             |             |              |
| 1982                             | -12.0        | -11.5       | -6.0        | -2.7        | 1.7         | 5.1         | 7.5         | 7.1         | 4.2         | -1.7        | -8.2        | -13.1        |
| 1983                             | -15.1        | -13.8       | -7.3        | -3.3        | 2.3         | 5.4         | 7.7         | 6.6         | 4.4         | -0.6        | -12.6       | -12.6        |
| 1984                             | -13.5        | -8.4        | -4.8        | -0.7        | 2.6         | 6.4         | 7.1         | 6.0         | 3.5         | -0.4        | -8.4        | -9.9         |
| 1985                             | -13.2        | -11.1       | -4.5        | -1.3        | 2.9         | 5.6         | 6.6         | 7.9         | 3.6         | -1.9        | -9.9        | -12.2        |
| 1986                             | -13.8        | -11.0       | -6.7        | -2.3        | 2.4         | 6.6         | 7.7         | 6.7         | 2.9         | -3.0        | -7.7        | -11.6        |
| 1987                             | -12.8        | -8.8        | -5.6        | -1.6        | 2.2         | 7.6         | 7.7         | 6.2         | 3.7         | -1.5        | -6.7        | -12.5        |
| 1988                             | -12.2        | -8.5        | -6.7        | -1.6        | 2.6         | 6.5         | 8.1         | 7.3         | 4.0         | -0.1        | -7.8        | -10.9        |
| 1989                             | -13.7        | -10.3       | -5.4        | -2.5        | 2.9         | 6.4         | 8.0         | 6.7         | 5.1         | -0.9        | -7.9        | -13.6        |
| 1990                             | -10.9        | -9.8        | -7.0        | -2.6        | 1.7         | 5.9         | 7.6         | 6.8         | 3.6         | -1.9        | -7.1        | -11.4        |
| 1991                             | -14.6        | -8.6        | -5.0        | -1.6        | 3.0         | 6.6         | 8.5         | 6.9         | 3.7         | -1.0        | -8.4        | -12.3        |
| 1992                             | -13.7        | -12.7       | -5.2        | -0.9        | 2.1         | 5.8         | 6.5         | 7.0         | 4.7         | -2.3        | -8.9        | -13.2        |
| 1993                             | -13.8        | -9.0        | -6.4        | -1.6        | 2.5         | 5.5         | 7.7         | 7.1         | 3.4         | -1.5        | -7.0        | -10.9        |
| 1994                             | -11.1        | -10.5       | -6.5        | -1.5        | 3.0         | 6.2         | 7.7         | 7.8         | 5.8         | -1.6        | -7.9        | -11.7        |
| 1995                             | -14.4        | -11.8       | -5.8        | -2.3        | 4.9         | 7.6         | 7.5         | 6.7         | 4.9         | -0.7        | -7.5        | -12.3        |
| 1996                             | -13.4        | -9.8        | -4.7        | -1.0        | 3.0         | 5.6         | 8.0         | 7.9         | 3.7         | -1.0        | -7.1        | -11.7        |
| 1997                             | -13.6        | -12.1       | -5.5        | -2.9        | 2.3         | 5.3         | 7.6         | 7.3         | 3.2         | -3.4        | -8.7        | -14.4        |
| 1998                             | -13.2        | -10.0       | -6.2        | -0.5        | 4.3         | 7.8         | 8.2         | 7.4         | 5.1         | -0.1        | -6.2        | -11.5        |
| 1999                             | -12.2        | -7.0        | -3.9        | 0.9         | 3.0         | 7.2         | 7.7         | 7.1         | 4.8         | -1.0        | -7.2        | -12.9        |
| 2000                             | -12.9        | -11.7       | -7.0        | -2.0        | 3.1         | 7.0         | 8.7         | 6.8         | 3.7         | -0.8        | -7.0        | -11.8        |
| 2001                             | -11.8        | -8.5        | -6.7        | -1.9        | 1.8         | 5.7         | 9.0         | 7.3         | 5.4         | -0.5        | -6.7        | -10.6        |
| 2002                             | -13.3        | -8.5        | -5.8        | -0.1        | 2.0         | 6.9         | 8.8         | 7.3         | 4.4         | -2.2        | -7.6        | -10.3        |
| 2003                             | -11.8        | -9.4        | -5.3        | -0.1        | 2.0         | 5.9         | 7.7         | 8.4         | 5.0         | 0.2         | -6.0        | -10.5        |
| 2004                             | -12.3        | -10.3       | -3.5        | -0.6        | 3.2         | 5.8         | 7.3         | 7.9         | 5.0         | -1.6        | -8.5        | -10.3        |
| 2005                             | -11.1        | -8.9        | -4.7        | -1.3        | 2.4         | 6.6         | 8.7         | 8.2         | 5.6         | -0.9        | -7.3        | -11.1        |
| 2006                             | -8.2         | -6.5        | -5.6        | -1.6        | 3.0         | 7.2         | 9.8         | 8.6         | 5.3         | -1.2        | -7.0        | -10.8        |
| <b>Mean</b>                      | <b>-12.7</b> | <b>-9.9</b> | <b>-5.7</b> | <b>-1.5</b> | <b>2.7</b>  | <b>6.3</b>  | <b>7.9</b>  | <b>7.2</b>  | <b>4.4</b>  | <b>-1.3</b> | <b>-7.8</b> | <b>-11.8</b> |
| <b>Trend (year<sup>-1</sup>)</b> | <b>0.09</b>  | <b>0.09</b> | <b>0.04</b> | <b>0.06</b> | <b>0.02</b> | <b>0.03</b> | <b>0.06</b> | <b>0.06</b> | <b>0.06</b> | <b>0.02</b> | <b>0.09</b> | <b>0.05</b>  |

All months showed temperature increases during this period.

**Table S3. Monthly precipitation on the Tibetan Plateau between 1983 and 2006, averaged over the 25 weather stations shown in Fig. 1, as well as long-term precipitation trends for all months**

| Year                              | Jan        | Feb        | Mar        | Apr        | May        | Jun         | Jul         | Aug        | Sep         | Oct        | Nov        | Dec        |
|-----------------------------------|------------|------------|------------|------------|------------|-------------|-------------|------------|-------------|------------|------------|------------|
|                                   | mm         |            |            |            |            |             |             |            |             |            |            |            |
| 1983                              | 4          | 4          | 12         | 19         | 40         | 100         | 158         | 120        | 162         | 26         | 7          | 2          |
| 1984                              | 4          | 2          | 6          | 14         | 49         | 116         | 201         | 103        | 117         | 49         | 1          | 2          |
| 1985                              | 4          | 3          | 12         | 17         | 62         | 114         | 216         | 93         | 123         | 25         | 5          | 3          |
| 1986                              | 1          | 3          | 6          | 26         | 49         | 97          | 148         | 168        | 158         | 24         | 4          | 3          |
| 1987                              | 1          | 5          | 7          | 24         | 43         | 102         | 143         | 118        | 126         | 20         | 4          | 3          |
| 1988                              | 3          | 7          | 14         | 20         | 54         | 81          | 162         | 139        | 115         | 14         | 3          | 4          |
| 1989                              | 4          | 7          | 10         | 27         | 60         | 122         | 144         | 135        | 117         | 36         | 6          | 2          |
| 1990                              | 2          | 8          | 10         | 24         | 51         | 78          | 153         | 162        | 131         | 34         | 8          | 4          |
| 1991                              | 6          | 5          | 10         | 20         | 42         | 96          | 169         | 117        | 109         | 40         | 2          | 2          |
| 1992                              | 2          | 6          | 11         | 12         | 50         | 100         | 156         | 135        | 97          | 21         | 6          | 5          |
| 1993                              | 8          | 6          | 13         | 18         | 50         | 94          | 140         | 118        | 130         | 27         | 2          | 2          |
| 1994                              | 8          | 5          | 12         | 25         | 48         | 103         | 173         | 168        | 88          | 25         | 2          | 2          |
| 1995                              | 5          | 9          | 13         | 25         | 35         | 81          | 113         | 105        | 115         | 19         | 7          | 3          |
| 1996                              | 5          | 7          | 11         | 17         | 56         | 87          | 150         | 175        | 97          | 31         | 9          | 5          |
| 1997                              | 2          | 9          | 18         | 21         | 57         | 91          | 168         | 88         | 122         | 35         | 4          | 0          |
| 1998                              | 2          | 6          | 16         | 21         | 57         | 83          | 132         | 111        | 101         | 29         | 7          | 5          |
| 1999                              | 3          | 4          | 12         | 15         | 68         | 122         | 197         | 183        | 92          | 46         | 5          | 2          |
| 2000                              | 3          | 6          | 11         | 25         | 53         | 110         | 180         | 146        | 80          | 58         | 5          | 1          |
| 2001                              | 4          | 4          | 10         | 29         | 58         | 89          | 110         | 138        | 115         | 21         | 5          | 3          |
| 2002                              | 5          | 3          | 8          | 16         | 60         | 104         | 134         | 135        | 123         | 27         | 5          | 3          |
| 2003                              | 3          | 5          | 10         | 17         | 58         | 104         | 147         | 78         | 110         | 19         | 6          | 1          |
| 2004                              | 5          | 3          | 7          | 21         | 59         | 108         | 168         | 202        | 122         | 33         | 3          | 3          |
| 2005                              | 5          | 8          | 17         | 26         | 55         | 91          | 155         | 175        | 109         | 34         | 5          | 2          |
| 2006                              | 1          | 6          | 13         | 19         | 50         | 94          | 201         | 162        | 156         | 44         | 4          | 1          |
| <b>Mean</b>                       | <b>4</b>   | <b>5</b>   | <b>11</b>  | <b>21</b>  | <b>53</b>  | <b>99</b>   | <b>159</b>  | <b>136</b> | <b>117</b>  | <b>31</b>  | <b>5</b>   | <b>3</b>   |
| <b>Trend (year<sup>-1</sup>)*</b> | <b>0.0</b> | <b>0.1</b> | <b>0.1</b> | <b>0.1</b> | <b>0.4</b> | <b>-0.2</b> | <b>-0.5</b> | <b>1.5</b> | <b>-0.9</b> | <b>0.3</b> | <b>0.0</b> | <b>0.0</b> |

\*None of the trends are significant at  $P < 0.05$ .
